# Supplementary material for: AD-HIES Fracture Healing Impaired by STAT3 Dysfunction Affecting Stem Cell Mobilization
Source: Research Square preprint supplement (doi:10.21203/rs.3.rs-6381295/v1), 2025-04-11
Supplement: Supplementary file 1 [file a3bfed3fbafff8f7d8baabf2.docx]

The Supplementary information includes:

Materials and Methods

Supplemental Figure 1 to 2.

Supplementary Table 1.

**CT analysis**

Fractured femurs from mice were skinned and fixed in 70% ethanol. The femurs were scanned using a Skyscan 1172 micro-CT scanner (Bruker, Kartuizersweg, Belgium) at a spatial resolution of 5 μm. The x-ray settings were 49 kVp and 179 μA. Three-dimensional bone reconstruction was performed using CTVol software.

**Histology and immunostaining**

Tissues were fixed in 4% paraformaldehyde for 48 hours and decalcified in 15% diethyl pyrocarbonate–EDTA (pH 7.8). Specimens were then embedded in paraffin and sectioned at a thickness of 5 μm.

Frozen bone samples were thawed at room temperature for 10 minutes, rehydrated with PBS, and blocked for 1 hour. Samples were incubated with primary antibodies overnight at 4°C. Following incubation, the samples were washed three times with PBS and subsequently incubated with secondary antibodies for 1 hour, followed by another three PBS washes. The samples were mounted with fluoroshield mounting medium containing 4′,6-diamidino-2-phenylindole (DAPI). Images were acquired using an Olympus confocal microscope and an Olympus fluorescence microscope.

The following primary antibodies were used:

SOX9 (1:200 dilution; R&D Systems, AF3075)

OPN (1:200 dilution; R&D Systems, AF808)

EMCN (1:200 dilution; Santa Cruz Biotechnology, sc-65495)

CXCL12 (1:200 dilution; Abcam, ab155090)

POSTN(1:200, R&D, AF2955)

CTSK(1:100, Santa Cruz, sc-48353)

CD200(1:100, Biolegend, 123809)

PDGFRa (1:100, R&D, AF1062)

Histological staining was performed using the Safranin O and Fast Green Cartilage Staining Kit and the Hematoxylin and Eosin Staining Kit (Beyotime Biotechnology).

**Sample preparation for frozen sections**

Freshly extracted fractured mouse femurs were collected and fixed in 4% paraformaldehyde for 36 hours at 4°C. Samples were decalcified in 15% EDTA for 21 days, followed by thorough washing in PBS. The samples were then incubated overnight at 4°C in PBS containing 30% sucrose and subsequently embedded in optimum cutting temperature (OCT) embedding medium. Prepared samples were stored at −80°C. Sections were cut at a thickness of 15 μm using a Leica cryostat.

**Biomechanical testing**

Fractured femurs were skinned and fixed in saline solution prior to testing. Three-point bending tests were conducted using an Instron 5569 universal testing machine (Instron, Canton, MA) at the femur midshaft with a displacement rate of 0.5 mm/s until the bone fractured. The maximum load was determined from load-deflection diagrams.

**Cell culture**

Primary PCs were isolated from the femurs of 4-week-old mice. After carefully removing the muscles and tendons, the periosteum was scraped under a dissecting microscope and digested with collagenase II (1 mg/ml; Sigma-Aldrich) and dispase II (2 mg/ml; Roche) for 30 minutes at 37°C. The digested cells were passed through a 70-μm nylon mesh (BD Falcon), pelleted at 1500 rpm for 5 minutes, and resuspended in α-minimal essential medium (α-MEM; Gibco) supplemented with 10% fetal bovine serum (Ausbian) and 1% penicillin/streptomycin (Gibco). Cells were cultured in an incubator at 37°C with 5% CO₂.

HUVECs were purchased from the American Type Culture Collection and cultured in endothelial cell basal medium 2 (EBM2; Promo Cell) containing 2% fetal calf serum and an endothelial cell growth supplement. HUVECs were cultured with conditional medium (CM) collected from periosteal cells infected with adenovirus expressing either Cre-EGFP or EGFP. Mouse CXCL12 (250 ng/ml) was added to the CM as indicated.

**Adenoviral infection**

Cre-EGFP and EGFP adenoviruses were purchased from Hanbio Biotechnology Co., Ltd. (Shanghai). For adenoviral infections, 2 × 10⁵ PCs were seeded in 12-well plates in α-MEM and allowed to adhere for 24 hours. PCs were then infected with adenovirus expressing either Cre-EGFP recombinase or EGFP at a multiplicity of infection of 30. After 4-6 hours of incubation, the medium was replaced with osteogenic medium (Cyagen, MUBMD-90021).

**Osteoblast differentiation**

For in vitro osteoblast differentiation, 2 × 103 PCs were seeded in 96-well plates and cultured in osteogenic medium (Cyagen, MUBMD-90021). ALP staining was performed on day 7 using an ALP staining kit (Beyotime Institute of Biotechnology, P0321S).

**Periosteal cell proliferation**

Periosteal cells (2 × 10³ cells/well) were cultured in 96-well plates for 1, 3, 5, or 7 days. Proliferation at each time point was assessed using the CCK-8 assay kit (Sigma, USA) according to the manufacturer’s instructions. The absorbance of the culture supernatants was measured at 450 nm using a microplate reader (SpectraFluor Plus, Tecan, Crailsheim, Germany).

**RT-PCR analysis**

Total RNA was extracted from osteoblasts using TRIzol reagent (Sigma, T9424) and reverse-transcribed into cDNA using the PrimeScript RT Master Mix kit (Takara Bio Inc., RR036A). Real-time reverse transcription PCR (RT-PCR) was performed on a Bio-Rad CFX96 system. The primer sets used for amplification are listed in Table S1.

**EdU assay**

DNA synthesis rate assessment was conducted utilizing Click-iT EDU Imaging Kits (Beyotime, Beijing, China), and experiments were finished with the method provided by the manufacturer.

To analyze cell proliferation after fracture, mice were injected intraperitoneally with 1 mg of 5-ethynyl-20-deoxyuridine (EdU) (Beyotime, Beijing, China) dissolved in DMSO at 24 and 48 h before sacrificed. Mice were euthanized at 10 days after the injury. Bones used for sectioning were stained for EdU with the Click-it EdU Alexa Fluor 647 Imaging Kit (C10340, Invitrogen) according to the manufacturer’s instructions.

**In vitro migration assays**

Periosteal cells or HUVECs were seeded in 24-well plates separated by a removable silicone stamp (Ibidi Culture-Inserts 2 Well for self-insertion, Ibidi, #80209). Cells were grown to confluency over 24 hours, after which the stamp was removed to initiate sheet migration. Images were captured 24 hours post-stamp removal. The extent of wound closure was quantified as the percentage of the area covered by migrating cells in the initial wound area, based on five replicates per condition, using Image-Pro Plus software.

**Transwell migration assays**

Vertical migration of periosteal cells or HUVECs was evaluated using a transwell migration assay with 24-well transwell inserts (3/8 μm pore size, Corning Costar, USA). A total of 250 μl of CM containing 20% FBS was added to the lower chamber, while 100 μl of HUVECs or PCs suspension containing 3% FBS was seeded into the upper chamber at a density of 2 × 10⁴ cells/well. After 24 hours of incubation, non-migratory cells on the upper surface of the membrane were gently removed with cotton swabs. Migrated cells on the lower surface were fixed in 4% paraformaldehyde and stained with 0.1% gentian violet. Images were captured from three to five randomly selected fields per well, and migrated cells were counted.

**Single-cell RNA-sequencing data collection and processing**

The Cell Ranger Single-Cell Software Suite was used to align the newly generated scRNA-seq data to the GRCm39 Mus musculus reference genome. The resulting unique molecular identifier (UMI) matrix was analyzed with Seurat (version 4.3.0). Low-quality cells, defined as those with fewer than 500 detected genes or more than 10% mitochondrial UMI counts, were excluded. Following quality control, the count data were normalized using the NormalizeData function in Seurat, and the logarithm-transformed normalized matrix was used for subsequent analyses. Principal component analysis (PCA) was conducted on the variable gene matrix. Batch effects were corrected using Harmony, with the top 30 principal components retained for downstream analyses. The RunHarmony function was applied to adjust batch effects across datasets and samples, with both theta and lambda parameters set to 1. The FindNeighbors function in Seurat was used to construct the Shared Nearest Neighbor Graph, which served as the basis for unsupervised clustering via the FindClusters function, with the resolution parameter set to 0.9. For visualization, dimensionality reduction was performed using Uniform Manifold Approximation and Projection (UMAP) through the RunUMAP function, with parameters umap.method = 'umap-learn', dims = 1:20, and reduction = 'harmony'. Default settings were applied for unspecified parameters.

After the first round of unsupervised clustering, cell clusters were annotated based on marker gene expression to identify major clusters. A second round of clustering was conducted using the same procedure, starting with the logarithm-transformed matrix. The top 1,000 highly variable genes were identified, followed by PCA and batch effect correction using Harmony. For specific major clusters of MSCs, the parameters harmony_theta = 3 and harmony_lambda = 1 were applied. Cell clusters were then detected, and dimensionality reduction was performed for visualization. To refine cell type and state definitions, differentially expressed genes were identified for each cluster using the FindAllMarkers function in Seurat. The top 100 ranked genes per cluster were subjected to gene set enrichment analysis against pathway databases using the clusterProfiler package (version 4.4.4).

**Differentiation states analysis and pseudo-time trajectory inference**

ScRNA-seq data were further analyzed using CytoTRACE, an algorithm for reconstructing cellular differentiation trajectories and tracing chromatin dynamics. Pseudotime analysis was performed with the Monocle2 (version 2.24.0) and Monocle3 (version 1.3.1) R packages.

**ELISA analysis**

We used the Mouse SDF-1/CXCL12 ELISA Kit (Elabscience, E-EL-M3046) and the Mouse CXCL9/MIG ELISA Kit (Elabscience, E-EL-M0020) to analyze CXCL12 and CXCL9 in the conditioned medium of periosteal cells, respectively. ELISA analysis was performed according to the manufacturer’s instructions.

**Chromatin immunoprecipitation (ChIP) and qPCR**

ChIP analysis in C3H10T1/2 cells was conducted using an enzymatic chromatin immunoprecipitation kit (Millipore, Catalog #17-371) following the manufacturer’s protocol. Briefly, C3H10T1/2 cells at 80–90% confluence in 10 cm dishes were cross-linked with 1% formaldehyde for 10 minutes at room temperature and quenched with glycine. Chromatin digestion was performed to produce DNA fragments ranging from 250 to 500 bp using micrococcal nuclease (Bioruptor™, Diagenode, Belgium). Immunoprecipitation was carried out with STAT3 antibody (CST, #12640, Rabbit monoclonal, 1:50), while IgG (Millipore, No. 12-371B) was used as a negative control. The primers sequences for ChIP-qPCR are listed in table S1.

**Luciferase reporter assay**

We assessed CXCL12 or mutant CXCL12 transcriptional activity using the Dual-Luciferase Reporter Assay System. 293T cells were seeded at a density of 2 × 10⁵ cells/well in 24-well plates for 18-24 hours and transfected using Lipofectamine 6000 (Life Technologies, 11668019) with luciferase reporter plasmids (CXCL12-Luc or CXCL12-mu-Luc), renilla, and either STAT3 (wild-type or mutants, including STAT3-C, STAT3-DN, R382W, R382Q, V637M, T714A) according to a previously published protocol44. Empty vector plasmids were used to maintain a constant DNA amount across all wells. Luciferase activity in cell extract supernatants was measured 48 hours post-transfection using the Dual-Luciferase Reporter Assay System (Promega, E1910), following the manufacturer’s instructions.

**In vitro tube formation assay**

HUVECs were serum-starved for 16 hours before being seeded at a density of 1 × 104 cells per well onto growth factor-depleted Matrigel (BD Biosciences, NSW, Australia) in 24-well plates. CM was added, and results were quantified 6 hours later. Before imaging, cells were labeled with calcein. Tube areas were quantified using Image-Pro Plus software.

**Mice treated with CXCL12**

8-week-old mice (five per group) were subcutaneously administered mouse SDF-1 alpha/CXCL12 (HY-P7285, 100 ng in 50 μl) every other day for 2 weeks.

**Mice treated with STAT3 agonist colivelin**

8-week-old mice (five per group) were intraperitoneally administered colivelin (MCE, HY-P1061A) at a dose of 1.5 mg/kg every other day for 4 weeks.

**Statistical analysis**

All results were presented as the mean±s.d. using GraphPad Prism 6.00 (GraphPad Software, San Diego, CA, USA) and analyzed using Student’s t test or ANOVA (analysis of variance). Pearson’s linear correlation coefficients were used to measure the dependency of two variables. The level of significance was set at P < 0.05.

Supplemental Tables 1


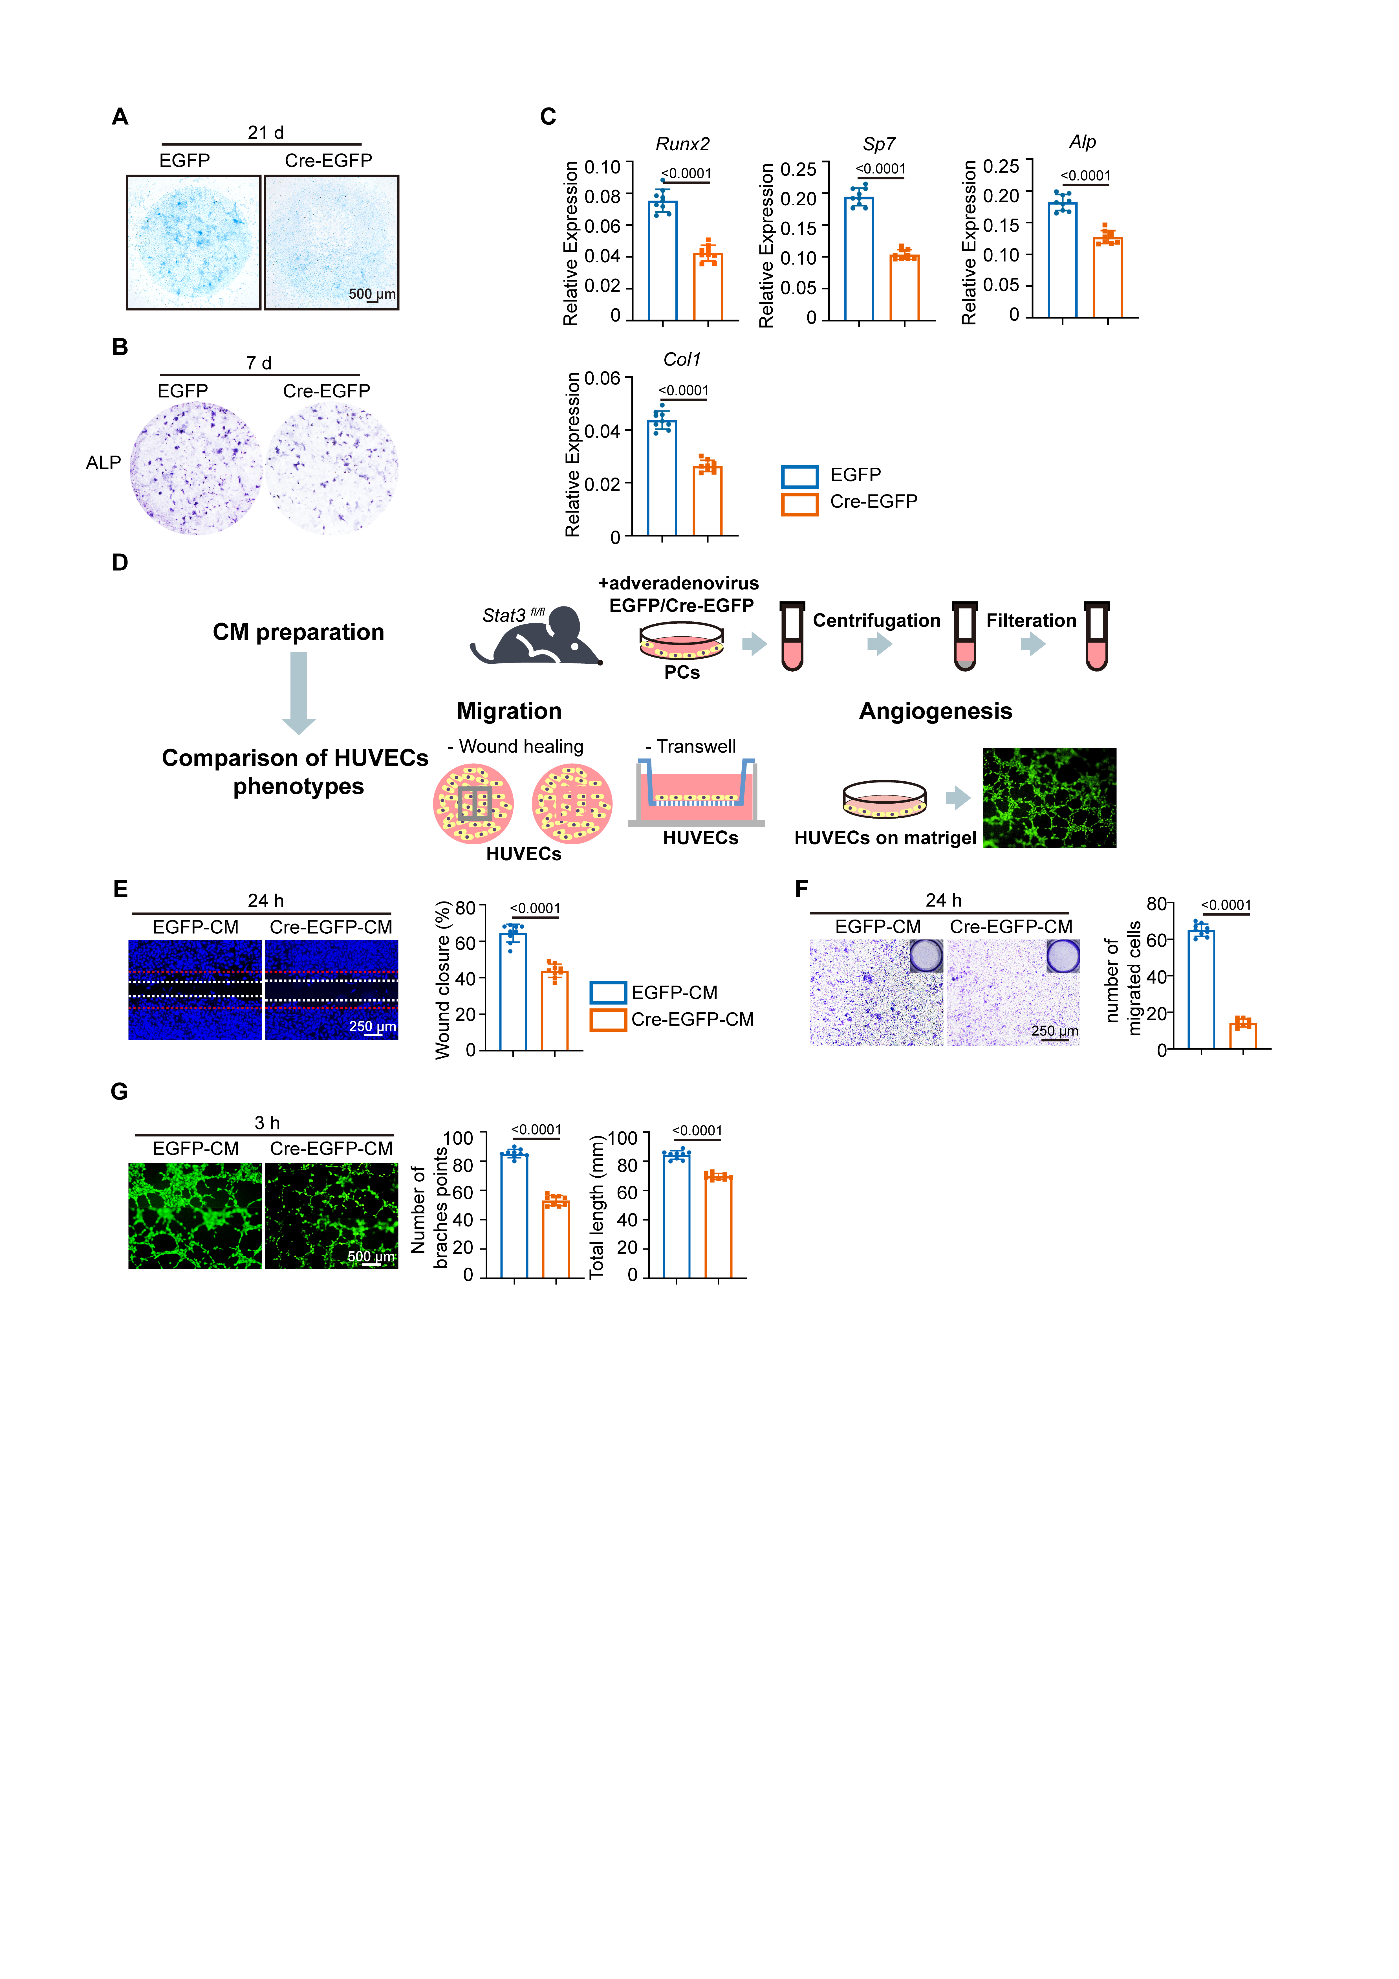


**Supplemental Figure 1. Ablation of STAT3 affect PCs osteoblastic differentiation and affects angiogenesis in vitro.** (**A**) Periosteal cells from 4-week-old male *Stat3fl/fl* mice were infected with adenovirus expressing EGFP or Cre-EGFP for 4 h then induced by chondrogenic medium. Alcian blue staining of periosteal cells after culture in chondrogenic medium for 21 days. (**B**) ALP staining of PCs after culture in osteogenic medium for 7 days.(**C**) The relative mRNA levels of *Runx2*, *Sp7*, *Alp* and *Col1* in PCs after culture in osteogenic medium for 7 days. *n =* 9. (**D**) Scheme of currently used in vitro culture of HUVEC.(**E**) Representative graphs of wounds in HUVECs after 24 h. Dotted lines highlight the linear wound for each group of cells. The bar graph shows the mean percentage of wound closure. *n =* 9 per group. (**F**) Representative graphs of transwell migration assay in HUVECs. *n =* 9. (**G**) Representative photomicrographs of tube formation of HUVECs incubated with Matrigel and quantitative analysis of tube area. *n =* 9.


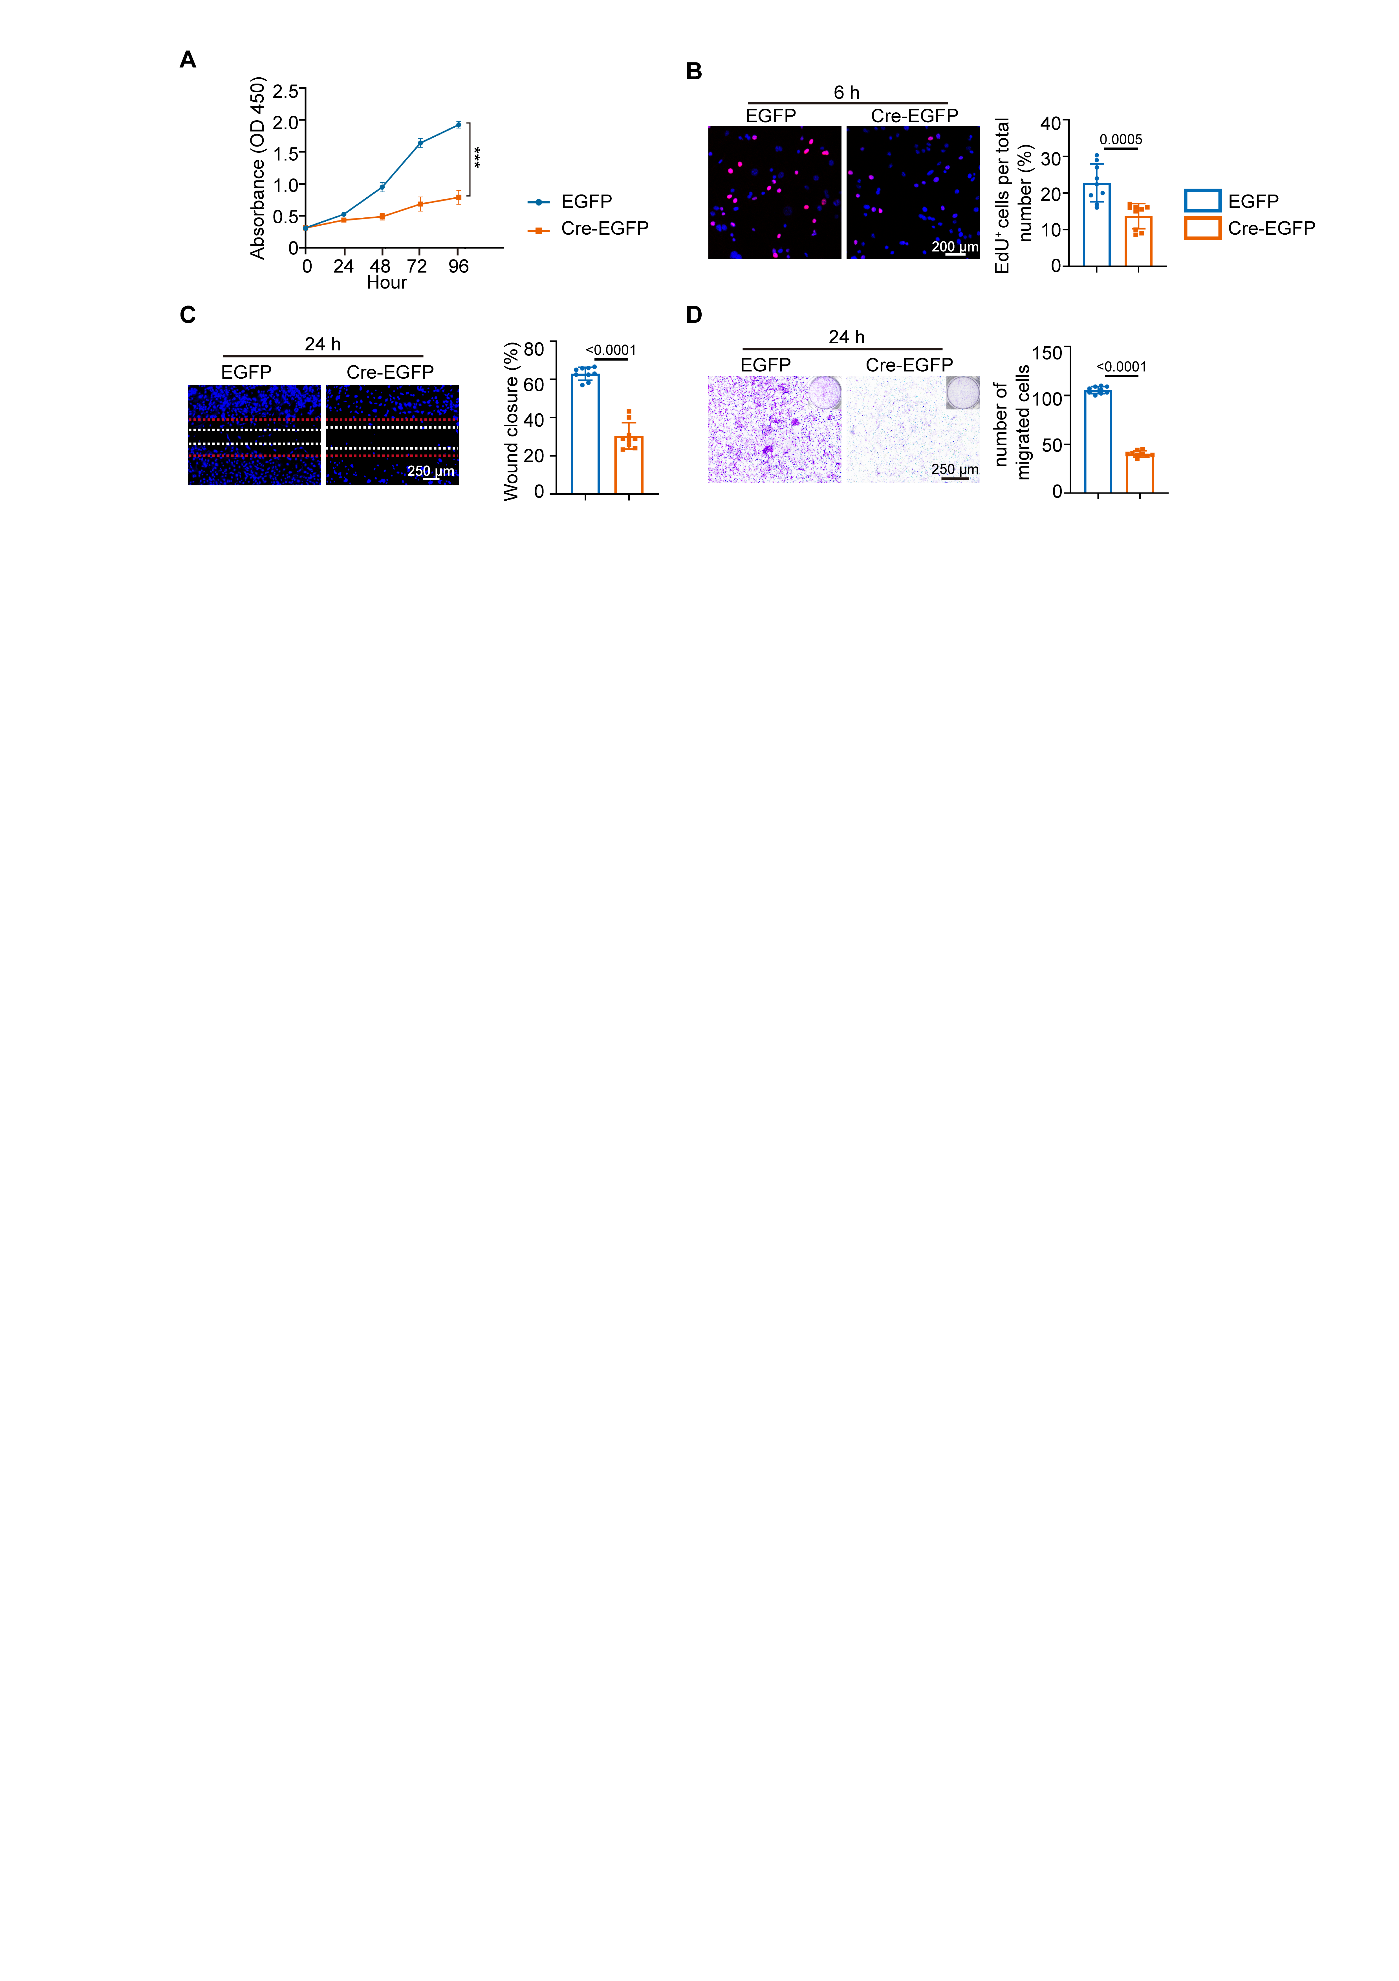


**Supplemental Figure 2.** **Ablation of STAT3 affect PCs proliferation and migration.** (**A**) Periosteal cells from 4-week-old male *Stat3fl/fl* mice were infected with adenovirus expressing EGFP or Cre-EGFP for 4 h. Cell viability was assessed using CCK8 after 24, 48, 72 and 96 hours. (**B**) Cell proliferation after transfection with adenovirus expressing EGFP or Cre-EGFP was evaluated using an EdU labeling assay. (**C**) Representative graphs of wounds in PCs after 24 h. Dotted lines highlight the linear wound for each group of cells. The bar graph shows the mean percentage of wound closure. n=9 per group. (**D**) Transwell migration assay results of PCs with different treatments. PCs were transfected with adenovirus expressing EGFP or Cre-EGFP.

**Supplementary Table 1. Primers for ChIP-qPCR and RT-qPCR**

Chip-primers

| Name | Sequence(5’-3’) | Species |
| --- | --- | --- |
| *Cxc12*-Forward | AGTTGACCGTGCAAGAGGTT | Mouse |
| *Cxc12*-Reverse | AAGAGAACACGCTACACCCG | mouse |

qPCR-premers

| Name | Sequence(5’-3’) | Species |
| --- | --- | --- |
| *Runx2*-Forward | GGACCGTCCACTGTCACTTT | Mouse |
| *Runx2*-Reverse | GGCCGGGAATGATGAGAACTAC | Mouse |
| *Sp7*-Forward | GAGCGAGGATTCTGTGGA | Mouse |
| *Sp7*-Reverse | TCGACTGTAGGGACGATTG | Mouse |
| *ALP*-Forward | CGGGACTGGTACTCGGATAA | Mouse |
| *ALP*-Reverse | ATTCCACGTCGGTTCTGTTC | Mouse |
| *Col1*-Forward | GCTCCTCTTAGGGGCCACT | Mouse |
| *Col1*-Reverse | CCACGTCTCACCATTGGGG | Mouse |
